# Supplementary material for: MicroRNA Profiling of Laser-Microdissected Hepatocellular Carcinoma Reveals an Oncogenic Phenotype of the Tumor Capsule
Source: PubMed Central journal article supplement — Transl Oncol. 2014 Dec 10;7(6):672–80. doi: 10.1016/j.tranon.2014.09.003 (PMC4311039; doi:10.1016/j.tranon.2014.09.003), 2014-12-10
Supplement: mmc4.pdf [file mmc4.pdf]

**Table S1. Percentages of tissue area for each sub-compartment of the screening group.**

| <b>Case #</b> | <b>TP %</b> | <b>TC%</b> | <b>LP %</b> | <b>LC%</b> |
|---------------|-------------|------------|-------------|------------|
| <b>1</b>      | 90          | 10         | 85          | 15         |
| <b>2</b>      | 85          | 15         | 70          | 30         |
| <b>3</b>      | 95          | 5          | 95          | 5          |
| <b>4</b>      | 90          | 10         | 80          | 20         |
| <b>5</b>      | 95          | 5          | 80          | 20         |
| <b>6</b>      | 95          | 5          | 95          | 5          |

**Table S2. Signaling pathways enriched in TC compartment**

| <b>KEGG pathway</b>                                  | <b>p-value</b> |
|------------------------------------------------------|----------------|
| ECM-receptor interaction                             | <1E-16         |
| Glycosaminoglycan biosynthesis - chondroitin sulfate | <1E-16         |
| Wnt signaling pathway                                | <1E-16         |
| PI3K-Akt signaling pathway                           | <1E-16         |
| Fatty acid biosynthesis                              | 5,6E-16        |
| MAPK signaling pathway                               | 6,1E-13        |
| Focal adhesion                                       | 8,4E-12        |
| Pathways in cancer                                   | 2,4E-11        |
| ErbB signaling pathway                               | 2,7E-10        |
